# Supplementary material for: Nucleocytoplasmic shuttling of Gle1 impacts DDX1 at transcription termination sites
Source: PubMed Central journal article supplement — Mol Biol Cell. 2020 Oct 1;31(21):2398–408. doi: 10.1091/mbc.E20-03-0215 (PMC7851961; doi:10.1091/mbc.e20-03-0215), 2020-10-01
Supplement: mbc-31-2398-s001.pdf [file mbc-31-2398-s001.pdf]

# Supplemental Materials

*Molecular Biology of the Cell*

Sharma and Wente

## Supplementary Figure 1

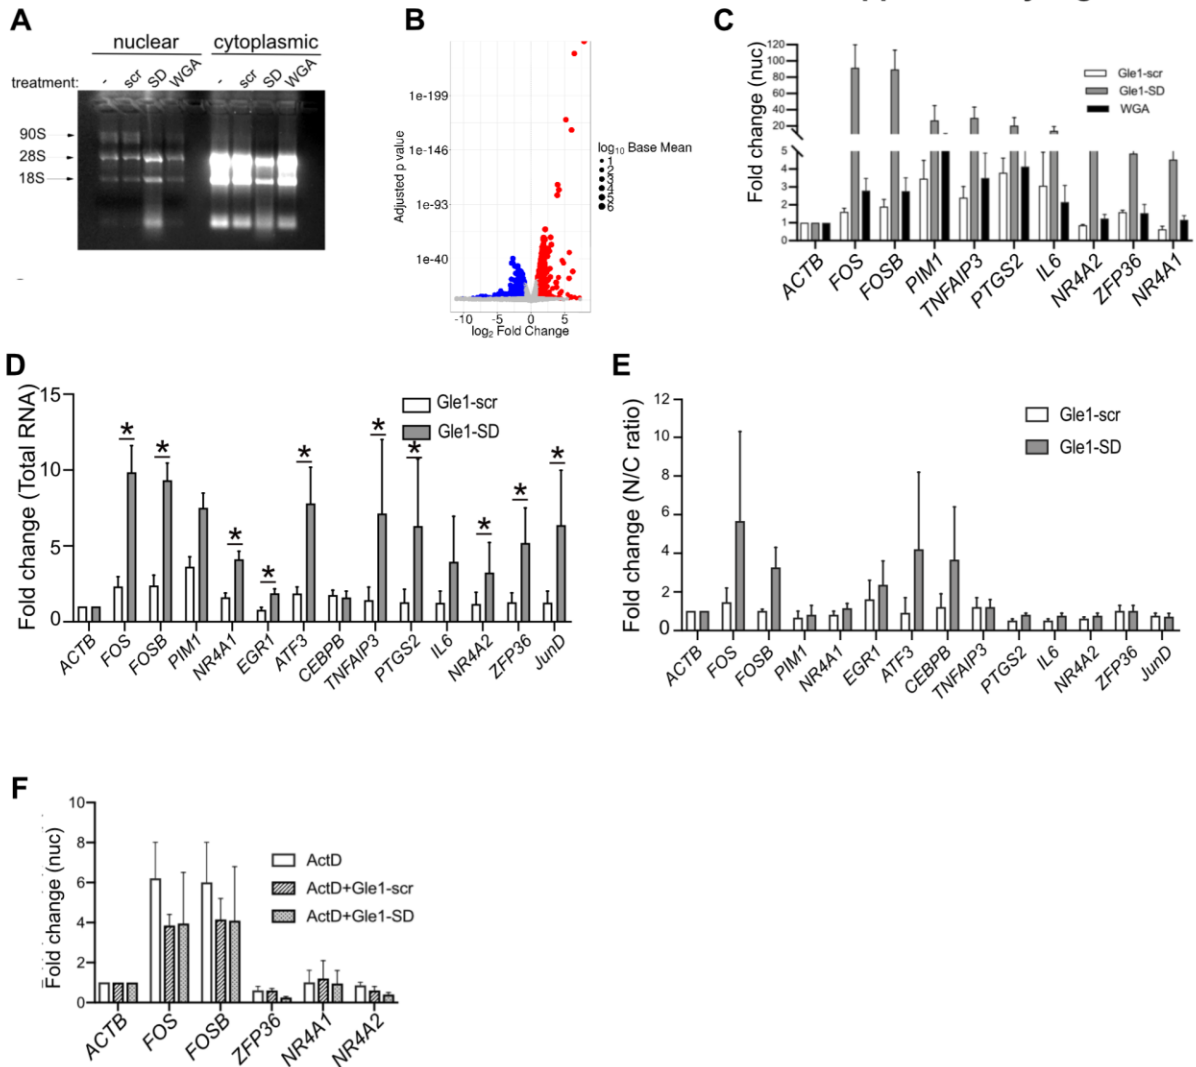

**Supplementary Figure 1:** (A) RNA gel showing equal volumes of nuclear and cytoplasmic RNA fractions under different treatments. Nuclear fraction is marked by the presence of 90s RNA, which is absent from cytoplasmic RNA. (B) Volcano plot showing differences in accumulation of all the transcripts as quantified using edgeR method (red and blue represents Gle1-SD and Gle1-scr treated samples). (C) HeLa cells were treated with 0.5mg/ml of Wheat Germ Agglutinin (WGA) or 5  $\mu$ M of Gle1-scr or Gle1-SD for 4 hours and tested for nuclear accumulation of selected target genes using RT-qPCR and normalized using  $\Delta\Delta$ CT values as detailed in Figure 1. The graph represents data of (mean  $\pm$  sem) from 3 biological replicates performed in triplicates. (D) Total RNA was extracted from Gle1-scr or Gle1-SD treated cells and targets were amplified using RT-qPCR. Fold change of twelve gene targets was calculated using  $\Delta\Delta$ CT method as in Figure 1. The graph represents mean  $\pm$  sem from 3 biological repeats performed in triplicates. (E) Amplicons from Gle1-scr or Gle1-SD treated cells were amplified from nuclear and cytoplasmic compartments of the cell. Fold change was calculated using  $\Delta\Delta$ CT method. The ratio of nuclear fold change to cytoplasmic fold change (mean  $\pm$  sem) is depicted in the graph. The graph represents data from 3 biological replicates performed in triplicates. (F) HeLa cells were pre-treated with 0.5mg/ml of Actinomycin D or DMSO for 1 hour prior to Gle1-SD or scr treatment (5 $\mu$ M) for 4 hours. RT-qPCR was performed on nuclear RNA as in Figure 1. The graph represents data from 2 biological repeats performed in triplicates.

## Supplementary Figure 2

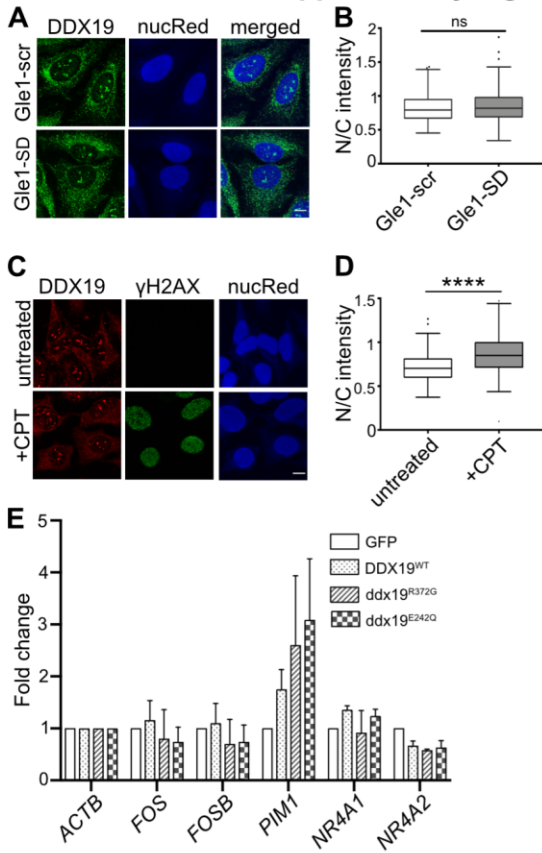

**Supplementary Figure 2: Gle1's effect is not mediated through DDX19.** (A) Gle1-scr or Gle1-SD peptide treated HeLa cells were immunostained with DDX19 antibody and imaged by confocal microscopy. Scale bar 10  $\mu$ m. (B) Nuclear-cytoplasmic intensity was quantified from three independent experiments and plotted on the graph. Unpaired two-tailed t-test was used to calculate significance (ns represents non-significant). (C) HeLa cells were treated with 250 nM camptothecin (CPT) for 18 hrs and immunostained with DDX19 and  $\gamma$ H2AX antibodies. NucRed is pseudo-colored as blue in the confocal images. Scale bar 10  $\mu$ m. (D) Nuclear-cytoplasmic intensity of DDX19 from two independent experiments was measured in ImageJ. Unpaired, two-tailed t-test was used to analyze statistical significance (ns represents non-significant, \*\*\*\* represents  $p < 0.0001$ ). (E) HeLa cells were transfected with *GFP*, *GFP-DDX19<sup>wt</sup>*, *GFP-DDX19<sup>R372G</sup>* or *GFP-DDX19<sup>E242Q</sup>* and flow sorted to isolate GFP-positive cells. Sorted cells were subjected to RT-qPCR from nuclear RNA. Fold change was calculated relative to actin in GFP transfected cells. Data represents mean  $\pm$  sem from at least 2 independent experiments and qPCR was performed in triplicates.

### Supplementary Fig 3

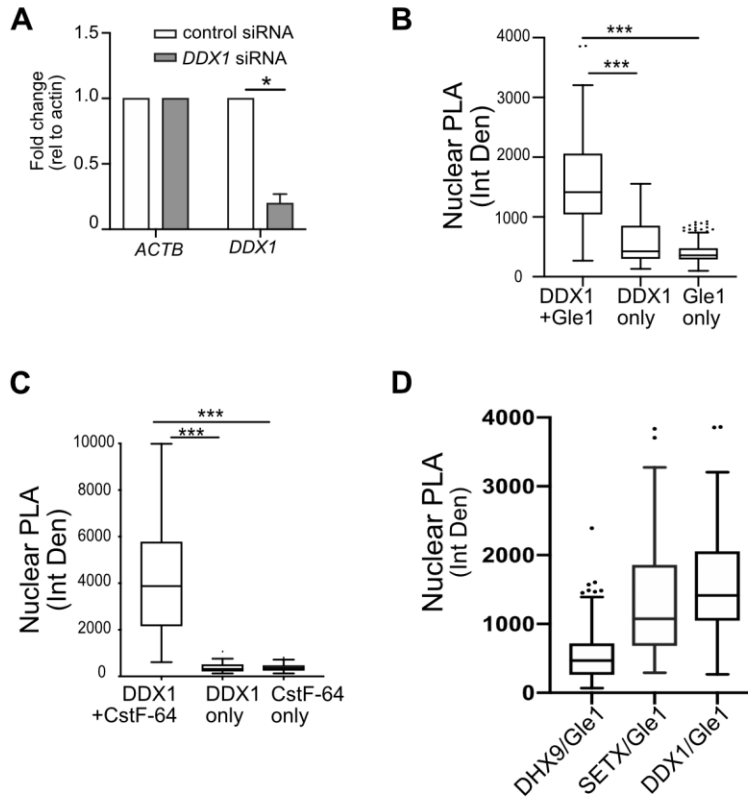

**Supplementary Figure 3:** (A) RT-qPCR data confirming reduced nuclear RNA levels of DDX1 upon silencing in Figure 4. Samples were normalized to actin and fold change was calculated using  $\Delta\Delta CT$  method (as detailed in Figure 1).  $\Delta CT$  values were used to calculate statistical significance using one-tailed, paired t-test (\* represents  $p < 0.05$ ). (B) Untreated HeLa cells were subjected to Proximity Ligation Assay (PLA) with either DDX1, Gle1 or both antibodies, counter stained with NucRed. Quantification of nuclear PLA signal measured as Integrated Density using ImageJ from maximum intensity projected cell images is depicted in the graph (\*\*\*) represents  $p < 0.0001$ ). (C) Nuclear PLA signal measured as Integrated Density using ImageJ in untreated cells stained with single antibody (DDX1, CstF-64 or both) is plotted in the graph. Data acquired from maximum intensity projected cell images. (D) Untreated HeLa cells were subjected to Proximity Ligation Assay (PLA) with either Gle1 and DHX9, SETX, DDX1 antibody (as indicated). Nuclear PLA signal measured as Integrated Density using ImageJ was quantified and depicted in the graph.

### Supplementary Fig 4

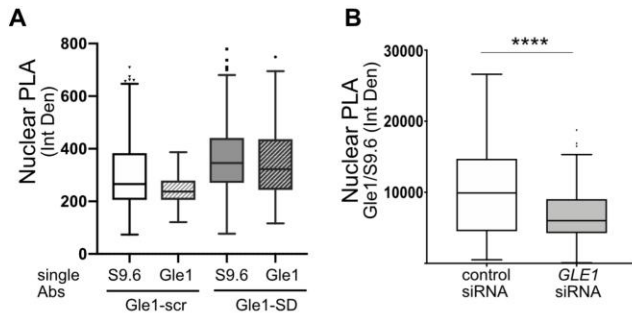

**Supplementary Figure 4:** (A) Single antibody controls for Proximity Ligation Assay (PLA) for Figure 7. Cells were counter stained with nucleolin antibody. Nuclear PLA signal (measured as Integrated Density from mid-plane sections) outside the nucleolus with individual antibodies was quantified for 200 cells from three independent experiments and depicted in the graph. (B) Specificity control for Proximity Ligation Assay for Figure 7. HeLa cells were transfected with control or *GLE1* siRNA, subjected to proximity ligation assay with Gle1 and S9.6 antibody and counter stained with nucleolin antibody. The graph shows nuclear PLA signal (measured as Integrated Density from mid-plane sections) outside the nucleolus for 150 randomly selected cells from three independent experiments. Statistical significance was calculated using unpaired two-tailed t-test \*\*\*\* represents  $p < 0.0001$ .

## Supplementary Figure 5

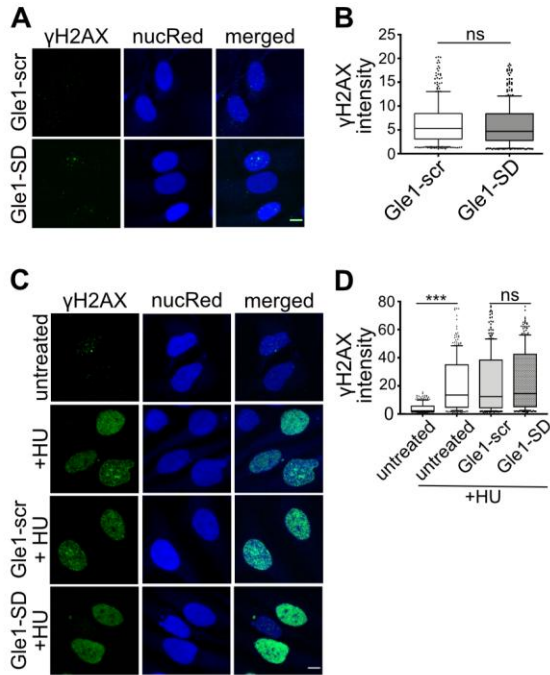

**Supplementary Figure 5: Gle1-SD treatment neither causes DNA damage nor pre-disposes cells to the damage.** (A) HeLa cells were treated with Gle1-scr or Gle1-SD peptide and immunostained with  $\gamma$ H2AX antibody to mark DNA damage and imaged on confocal microscope. NucRed is pseudo-colored as blue. Scale bar represents 10  $\mu$ m. (B) Nuclear intensity of  $\gamma$ H2AX was quantified from maximum intensity projected images and plotted on a box and whiskers graph from over 350 cells from at least 3 independent experiments. Unpaired, two-tailed t-test was used to analyze significance (ns represents non-significant). (C) HeLa cells were pre-treated with Gle1-scr or Gle1-SD peptide for 30 mins followed by 5mM hydroxyurea treatment in the presence of Gle1-scr or Gle1-SD peptide for 4 hrs, immunostained with  $\gamma$ H2AX antibody and imaged by confocal microscopy. Scale bar represents 10  $\mu$ m. (D) Nuclear intensity of  $\gamma$ H2AX was quantified from maximum intensity projected images and plotted on a box and whiskers graph from over 250 cells from at least 3 independent experiments. Unpaired, two-tailed t-test was used to analyze statistical significance (ns represents non-significant, \*\*\* represents  $p < 0.0005$ ).

**Supplementary Table S1: List of top 70 Gle1 target genes with 5 fold change - Gle1 SD vs Gle1-scrambled peptide**

|                 | Feature_gene_biot | Feature_gen | Gle1-scr | Gle1-scr | Gle1-SD  | Gle1-SD | baseMean | log2FoldChange | lfcSE | stat  | pvalue | padj | FoldChange |
|-----------------|-------------------|-------------|----------|----------|----------|---------|----------|----------------|-------|-------|--------|------|------------|
| ENSG00000169429 | protein_coding    | IL8         | 48.00    | 87.00    | 9291.00  | 7278.00 | 5617.73  | 7.87           | 0.18  | 43.66 | 0.00   | 0.00 | 233.29     |
| ENSG00000197632 | protein_coding    | SERPINB2    | 0.00     | 0.00     | 15.00    | 14.00   | 9.86     | 7.21           | 2.09  | 3.45  | 0.00   | 0.00 | 147.93     |
| ENSG00000197887 | protein_coding    | OR152       | 0.00     | 0.00     | 0.00     | 24.00   | 8.87     | 7.05           | 2.49  | 2.83  | 0.00   | 0.01 | 132.58     |
| ENSG00000255073 | protein_coding    | ZFP91-CNTF  | 0.00     | 0.00     | 25.00    | 2.00    | 8.56     | 7.01           | 2.29  | 3.06  | 0.00   | 0.01 | 128.83     |
| ENSG00000176798 | protein_coding    | OR51L1      | 0.00     | 0.00     | 25.00    | 0.00    | 7.82     | 6.88           | 2.56  | 2.69  | 0.01   | 0.02 | 117.68     |
| ENSG00000234485 | pseudogene        | OR7E46P     | 0.00     | 0.00     | 24.00    | 0.00    | 7.51     | 6.82           | 2.58  | 2.64  | 0.01   | 0.02 | 112.97     |
| ENSG00000255292 | protein_coding    | SDHD        | 0.00     | 0.00     | 11.00    | 10.00   | 7.13     | 6.74           | 2.29  | 2.94  | 0.00   | 0.01 | 107.01     |
| ENSG00000226537 | pseudogene        | OR7E33P     | 0.00     | 0.00     | 0.00     | 19.00   | 7.02     | 6.71           | 2.64  | 2.54  | 0.01   | 0.03 | 104.94     |
| ENSG00000068985 | protein_coding    | PAGE1       | 0.00     | 0.00     | 7.00     | 13.00   | 6.99     | 6.71           | 2.32  | 2.89  | 0.00   | 0.01 | 104.69     |
| ENSG00000159713 | protein_coding    | TPPP3       | 1.00     | 0.00     | 31.00    | 18.00   | 16.56    | 6.47           | 1.79  | 3.61  | 0.00   | 0.00 | 88.73      |
| ENSG00000163739 | protein_coding    | CXCL1       | 51.00    | 90.00    | 3488.00  | 2881.00 | 2179.80  | 6.43           | 0.19  | 33.39 | 0.00   | 0.00 | 86.11      |
| ENSG00000170345 | protein_coding    | FOS         | 59.00    | 130.00   | 4990.00  | 2230.00 | 2416.91  | 6.19           | 0.54  | 11.48 | 0.00   | 0.00 | 72.87      |
| ENSG00000081041 | protein_coding    | CXCL2       | 65.00    | 70.00    | 2797.00  | 1875.00 | 1591.96  | 6.01           | 0.22  | 27.77 | 0.00   | 0.00 | 64.28      |
| ENSG00000205449 | pseudogene        | NBPF22P     | 1.00     | 0.00     | 6.00     | 27.00   | 12.06    | 5.99           | 1.98  | 3.02  | 0.00   | 0.01 | 63.39      |
| ENSG00000260765 | pseudogene        | CES1P2      | 0.00     | 2.00     | 41.00    | 22.00   | 21.26    | 5.94           | 1.46  | 4.06  | 0.00   | 0.00 | 61.19      |
| ENSG00000178734 | protein_coding    | C13orf45    | 0.00     | 1.00     | 22.00    | 9.00    | 10.36    | 5.85           | 2.00  | 2.92  | 0.00   | 0.01 | 57.79      |
| ENSG00000115009 | protein_coding    | CCL20       | 13.00    | 19.00    | 483.00   | 383.00  | 298.23   | 5.68           | 0.38  | 14.83 | 0.00   | 0.00 | 51.19      |
| ENSG00000125740 | protein_coding    | FOSB        | 71.00    | 81.00    | 3004.00  | 1191.00 | 1406.99  | 5.65           | 0.56  | 10.01 | 0.00   | 0.00 | 50.05      |
| ENSG00000167390 | pseudogene        | POM121L3P   | 1.00     | 2.00     | 77.00    | 6.00    | 26.82    | 5.64           | 1.37  | 4.10  | 0.00   | 0.00 | 49.76      |
| ENSG00000143536 | protein_coding    | CRNN        | 0.00     | 1.00     | 26.00    | 1.00    | 8.65     | 5.60           | 2.24  | 2.49  | 0.01   | 0.04 | 48.45      |
| ENSG00000197124 | protein_coding    | ZNF682      | 0.00     | 1.00     | 13.00    | 11.00   | 8.28     | 5.52           | 2.11  | 2.62  | 0.01   | 0.03 | 46.04      |
| ENSG00000166592 | protein_coding    | RRAD        | 2.00     | 2.00     | 48.00    | 44.00   | 32.00    | 5.44           | 1.08  | 5.03  | 0.00   | 0.00 | 43.27      |
| ENSG00000073756 | protein_coding    | PTGS2       | 159.00   | 158.00   | 3424.00  | 2699.00 | 2125.99  | 5.16           | 0.18  | 28.60 | 0.00   | 0.00 | 35.85      |
| ENSG00000163734 | protein_coding    | CXCL3       | 20.00    | 30.00    | 443.00   | 307.00  | 260.83   | 4.82           | 0.37  | 13.09 | 0.00   | 0.00 | 28.27      |
| ENSG00000187479 | protein_coding    | C11orf96    | 42.00    | 33.00    | 611.00   | 394.00  | 350.64   | 4.61           | 0.34  | 13.52 | 0.00   | 0.00 | 24.43      |
| ENSG00000164400 | protein_coding    | CSF2        | 1.00     | 21.00    | 103.00   | 138.00  | 86.65    | 4.52           | 0.72  | 6.28  | 0.00   | 0.00 | 22.94      |
| ENSG00000215749 | protein_coding    | GOLGA6L18   | 12.00    | 14.00    | 10.00    | 256.00  | 102.41   | 4.37           | 1.78  | 2.46  | 0.01   | 0.04 | 20.74      |
| ENSG00000120738 | protein_coding    | EGR1        | 94.00    | 100.00   | 1682.00  | 466.00  | 733.57   | 4.30           | 0.78  | 5.50  | 0.00   | 0.00 | 19.73      |
| ENSG00000153234 | protein_coding    | NR4A2       | 489.00   | 650.00   | 6904.00  | 3816.00 | 3773.04  | 4.13           | 0.18  | 22.43 | 0.00   | 0.00 | 17.47      |
| ENSG00000145283 | protein_coding    | SLC10A6     | 2.00     | 5.00     | 41.00    | 22.00   | 22.15    | 4.10           | 1.11  | 3.68  | 0.00   | 0.00 | 17.19      |
| ENSG00000164949 | protein_coding    | GEM         | 23.00    | 34.00    | 273.00   | 232.00  | 181.22   | 4.07           | 0.40  | 10.22 | 0.00   | 0.00 | 16.83      |
| ENSG00000213885 | pseudogene        | RPL13AP7    | 0.00     | 4.00     | 17.00    | 14.00   | 11.11    | 4.00           | 1.62  | 2.48  | 0.01   | 0.04 | 16.02      |
| ENSG00000162891 | protein_coding    | IL20        | 2.00     | 3.00     | 20.00    | 20.00   | 14.53    | 3.94           | 1.33  | 2.96  | 0.00   | 0.01 | 15.30      |
| ENSG00000136244 | protein_coding    | IL6         | 470.00   | 862.00   | 5026.00  | 5425.00 | 3808.88  | 3.94           | 0.17  | 22.94 | 0.00   | 0.00 | 15.30      |
| ENSG00000162772 | protein_coding    | ATF3        | 968.00   | 1062.00  | 10387.00 | 5993.00 | 5831.86  | 3.89           | 0.18  | 21.87 | 0.00   | 0.00 | 14.79      |
| ENSG00000123358 | protein_coding    | NR4A1       | 347.00   | 356.00   | 3703.00  | 1639.00 | 1892.20  | 3.78           | 0.49  | 7.67  | 0.00   | 0.00 | 13.71      |
| ENSG00000118503 | protein_coding    | TNFAIP3     | 1407.00  | 1958.00  | 16457.00 | 7680.00 | 8585.05  | 3.73           | 0.42  | 8.97  | 0.00   | 0.00 | 13.27      |
| ENSG00000164651 | protein_coding    | SP8         | 2.00     | 3.00     | 12.00    | 21.00   | 12.40    | 3.69           | 1.42  | 2.59  | 0.01   | 0.03 | 12.89      |
| ENSG00000219773 | pseudogene        | RP11-506B6  | 2.00     | 3.00     | 7.00     | 23.00   | 11.57    | 3.58           | 1.50  | 2.39  | 0.02   | 0.04 | 11.96      |
| ENSG00000105808 | protein_coding    | RASA4       | 7.00     | 5.00     | 61.00    | 16.00   | 27.25    | 3.49           | 1.02  | 3.41  | 0.00   | 0.00 | 11.25      |
| ENSG00000144785 | protein_coding    | RP11-977G1  | 0.00     | 11.00    | 47.00    | 7.00    | 18.99    | 3.30           | 1.39  | 2.38  | 0.02   | 0.05 | 9.87       |
| ENSG00000168334 | protein_coding    | XIRP1       | 3.00     | 8.00     | 37.00    | 19.00   | 20.46    | 3.29           | 1.10  | 3.00  | 0.00   | 0.01 | 9.79       |
| ENSG00000127540 | protein_coding    | UQCR11      | 5.00     | 8.00     | 32.00    | 33.00   | 24.50    | 3.27           | 0.99  | 3.31  | 0.00   | 0.00 | 9.62       |
| ENSG00000177910 | pseudogene        | SPATA31C2   | 9.00     | 8.00     | 78.00    | 12.00   | 31.97    | 3.21           | 1.00  | 3.23  | 0.00   | 0.00 | 9.26       |
| ENSG00000163661 | protein_coding    | PTX3        | 26.00    | 49.00    | 193.00   | 164.00  | 134.04   | 3.20           | 0.44  | 7.27  | 0.00   | 0.00 | 9.17       |
| ENSG00000172602 | protein_coding    | RND1        | 4.00     | 9.00     | 31.00    | 27.00   | 21.91    | 3.12           | 1.04  | 3.01  | 0.00   | 0.01 | 8.68       |
| ENSG00000221869 | protein_coding    | CEBPD       | 11.00    | 14.00    | 61.00    | 53.00   | 43.16    | 3.10           | 0.74  | 4.19  | 0.00   | 0.00 | 8.60       |
| ENSG00000197576 | protein_coding    | HOXA4       | 1.00     | 10.00    | 27.00    | 17.00   | 16.48    | 3.03           | 1.26  | 2.40  | 0.02   | 0.04 | 8.15       |

|                 |                |            |         |         |          |          |          |      |      |       |      |      |      |
|-----------------|----------------|------------|---------|---------|----------|----------|----------|------|------|-------|------|------|------|
| ENSG00000108691 | protein_coding | CCL2       | 1153.00 | 1464.00 | 4664.00  | 6350.00  | 4275.46  | 3.01 | 0.19 | 16.01 | 0.00 | 0.00 | 8.07 |
| ENSG00000179388 | protein_coding | EGR3       | 14.00   | 2.00    | 47.00    | 29.00    | 28.69    | 2.99 | 1.04 | 2.88  | 0.00 | 0.01 | 7.96 |
| ENSG00000232810 | protein_coding | TNF        | 9.00    | 12.00   | 47.00    | 41.00    | 33.61    | 2.99 | 0.83 | 3.60  | 0.00 | 0.00 | 7.93 |
| ENSG00000184779 | protein_coding | RPS17      | 10.00   | 35.00   | 47.00    | 123.00   | 67.67    | 2.98 | 0.72 | 4.14  | 0.00 | 0.00 | 7.87 |
| ENSG00000166920 | protein_coding | C15orf48   | 0.00    | 19.00   | 38.00    | 29.00    | 25.53    | 2.91 | 1.18 | 2.46  | 0.01 | 0.04 | 7.49 |
| ENSG00000169242 | protein_coding | EFNA1      | 882.00  | 969.00  | 4537.00  | 2979.00  | 2856.38  | 2.90 | 0.17 | 17.02 | 0.00 | 0.00 | 7.49 |
| ENSG00000128016 | protein_coding | ZFP36      | 341.00  | 262.00  | 1629.00  | 852.00   | 937.07   | 2.87 | 0.28 | 10.33 | 0.00 | 0.00 | 7.33 |
| ENSG00000164266 | protein_coding | SPINK1     | 18.00   | 19.00   | 62.00    | 78.00    | 54.96    | 2.84 | 0.67 | 4.26  | 0.00 | 0.00 | 7.16 |
| ENSG00000137193 | protein_coding | PIM1       | 230.00  | 321.00  | 1318.00  | 754.00   | 789.17   | 2.81 | 0.23 | 12.05 | 0.00 | 0.00 | 7.02 |
| ENSG00000163331 | protein_coding | DAPL1      | 5.00    | 13.00   | 29.00    | 32.00    | 23.96    | 2.75 | 0.99 | 2.79  | 0.01 | 0.02 | 6.72 |
| ENSG00000198930 | protein_coding | CSAG1      | 34.00   | 55.00   | 159.00   | 149.00   | 120.49   | 2.73 | 0.45 | 6.09  | 0.00 | 0.00 | 6.64 |
| ENSG00000139318 | protein_coding | DUSP6      | 23.00   | 53.00   | 151.00   | 109.00   | 100.57   | 2.73 | 0.51 | 5.38  | 0.00 | 0.00 | 6.64 |
| ENSG00000112096 | protein_coding | SOD2       | 897.00  | 1657.00 | 3981.00  | 4504.00  | 3355.44  | 2.70 | 0.18 | 15.04 | 0.00 | 0.00 | 6.50 |
| ENSG00000011083 | protein_coding | SLC6A7     | 25.00   | 22.00   | 118.00   | 44.00    | 61.86    | 2.62 | 0.67 | 3.91  | 0.00 | 0.00 | 6.15 |
| ENSG00000146678 | protein_coding | IGFBP1     | 8.00    | 44.00   | 74.00    | 81.00    | 61.57    | 2.62 | 0.71 | 3.70  | 0.00 | 0.00 | 6.14 |
| ENSG00000113212 | protein_coding | PCDHB7     | 2.00    | 20.00   | 32.00    | 32.00    | 25.35    | 2.60 | 1.05 | 2.48  | 0.01 | 0.04 | 6.07 |
| ENSG00000124882 | protein_coding | EREG       | 314.00  | 378.00  | 1403.00  | 858.00   | 880.82   | 2.60 | 0.22 | 11.87 | 0.00 | 0.00 | 6.05 |
| ENSG00000172216 | protein_coding | CEBPB      | 161.00  | 180.00  | 650.00   | 445.00   | 429.67   | 2.57 | 0.27 | 9.67  | 0.00 | 0.00 | 5.95 |
| ENSG00000130066 | protein_coding | SAT1       | 455.00  | 644.00  | 1894.00  | 1528.00  | 1352.94  | 2.56 | 0.17 | 15.48 | 0.00 | 0.00 | 5.90 |
| ENSG00000182774 | protein_coding | RPS17L     | 39.00   | 176.00  | 259.00   | 343.00   | 243.20   | 2.54 | 0.46 | 5.54  | 0.00 | 0.00 | 5.80 |
| ENSG00000133134 | protein_coding | BEX2       | 5.00    | 16.00   | 33.00    | 28.00    | 24.20    | 2.53 | 0.98 | 2.57  | 0.01 | 0.03 | 5.77 |
| ENSG00000214016 | pseudogene     | RP6-105D16 | 8.00    | 77.00   | 129.00   | 106.00   | 93.11    | 2.53 | 0.68 | 3.73  | 0.00 | 0.00 | 5.76 |
| ENSG00000179776 | protein_coding | CDH5       | 11.00   | 36.00   | 98.00    | 35.00    | 51.48    | 2.45 | 0.75 | 3.27  | 0.00 | 0.00 | 5.47 |
| ENSG00000156711 | protein_coding | MAPK13     | 5.00    | 19.00   | 20.00    | 43.00    | 26.14    | 2.45 | 1.00 | 2.45  | 0.01 | 0.04 | 5.45 |
| ENSG00000138166 | protein_coding | DUSP5      | 163.00  | 264.00  | 716.00   | 476.00   | 475.18   | 2.40 | 0.26 | 9.40  | 0.00 | 0.00 | 5.29 |
| ENSG00000100906 | protein_coding | NFKBIA     | 5656.00 | 5545.00 | 19787.00 | 12654.00 | 12920.55 | 2.40 | 0.17 | 14.25 | 0.00 | 0.00 | 5.28 |
| ENSG00000141682 | protein_coding | PMAIP1     | 101.00  | 163.00  | 424.00   | 305.00   | 291.91   | 2.39 | 0.30 | 7.93  | 0.00 | 0.00 | 5.25 |
| ENSG00000188293 | protein_coding | IGFL1      | 49.00   | 101.00  | 159.00   | 237.00   | 163.29   | 2.39 | 0.43 | 5.50  | 0.00 | 0.00 | 5.24 |
| ENSG00000138670 | protein_coding | RASGEF1B   | 27.00   | 10.00   | 69.00    | 42.00    | 44.37    | 2.37 | 0.80 | 2.97  | 0.00 | 0.01 | 5.18 |
| ENSG00000163993 | protein_coding | S100P      | 58.00   | 66.00   | 213.00   | 134.00   | 138.63   | 2.37 | 0.43 | 5.57  | 0.00 | 0.00 | 5.17 |
| ENSG00000184497 | protein_coding | TMEM255B   | 7.00    | 22.00   | 22.00    | 49.00    | 29.87    | 2.33 | 0.94 | 2.50  | 0.01 | 0.03 | 5.05 |
| ENSG00000197061 | protein_coding | HIST1H4C   | 503.00  | 608.00  | 1324.00  | 1589.00  | 1201.84  | 2.32 | 0.20 | 11.31 | 0.00 | 0.00 | 4.99 |



**Supplementary Table S2**

**Primer list:**

| <b>Primer Name</b>   | <b>Forward primer (5'-3')</b> | <b>Reverse primer (5'-3')</b> |
|----------------------|-------------------------------|-------------------------------|
| <i>ACTB</i>          | CACCATTGGCAATGAGCGGTTC        | AGGTCTTTGCGGATGTCCACGT        |
| <i>FOS</i>           | GCCTCTCTTACTACCACTCACC        | AGATGGCAGTGACCGTGGGAAT        |
| <i>FOSB</i>          | GCCTCTCTTACTACCACTCACC        | AGATGGCAGTGACCGTGGGAAT        |
| <i>PIMI</i>          | TCTACTCAGGCATCCGCGTCTC        | CTTCAGCAGGACCACTTCCATG        |
| <i>TNFAIP3</i>       | CTCAACTGGTGTCGAGAAGTCC        | TTCCTTGAGCGTGCTGAACAGC        |
| <i>PTGS2</i>         | CGGTGAAACTCTGGCTAGACAG        | GCAAACCGTAGATGCTCAGGGA        |
| <i>IL6</i>           | AGACAGCCACTCACCTCTTCAG        | TTCTGCCAGTGCCTCTTTGCTG        |
| <i>ZFP36</i>         | GCTATGTTCGGACCTTCTCAGAG       | CCTGGAGGTAGAACTTGTGACAG       |
| <i>NR4A1</i>         | GGACAACGCTTCATGCCAGCAT        | CCTTGTTAGCCAGGCAGATGTAC       |
| <i>NR4A2</i>         | AAACTGCCAGTGGACAAGCGT         | GCTCTTCGGTTTCGAGGGCAA         |
| <i>EGR1</i>          | AGCAGCACCTTCAACCCTCAGG        | GAGTGGTTTGGCTGGGGTAACT        |
| <i>JUND</i>          | ATCGACATGGACACGCAGGAGC        | CTCCGTGTTCTGACTCTTGAGG        |
| <i>CEBPB</i>         | AGAAGACCGTGGACAAGCACAG        | CTCCAGGACCTTGTGCTGCGT         |
| <i>ACTB In1</i>      | CGGGGTCTTTGTCTGAGC            | CAGTTAGCGCCCAAAGGAC           |
| <i>FOSB primer A</i> | CCTGCCAACCACAATTCAATG         | TGCGTTTTTAAGAGCTTTTTTATT      |
| <i>FOSB primer B</i> | CAGTGCCTCCTACTAGAAAAAGTAAG    | GGATTACAGGTGTGCACCACC         |
| <i>FOSB primer C</i> | CTATACACAGAAGAAGCTTAATG       | CTTTTTTTTTTTTTTCTCAACATAATG   |
| <i>FOS primer A</i>  | GAGGAGAAACACATCTTC            | GCCTGGTGTGTTTCAC              |
| <i>FOS primer D</i>  | GATCCCTTATCAAAGAGGAC          | GAAGCAGTAGAAAATCTTAGC         |
| <i>FOS primer E</i>  | TCACGTGGAGGGTTATTC            | TGGATACGATAACGAGCAG           |
